# Supplementary material for: Tyrosine 23 Phosphorylation-Dependent Cell-Surface Localization of Annexin A2 Is Required for Invasion and Metastases of Pancreatic Cancer
Source: PubMed Central journal article supplement (PMC3084841; doi:10.1371/journal.pone.0019390), 2011-04-29
Supplement: pone.0019390.s001.pdf [file pone.0019390.s001.pdf]

**Table S1. Cell Surface Localization of Annexin A2 in Cells with Different Invasive Capacities**

|                        | Cell lines       | Cell Surface Localization of Annexin A2 |
|------------------------|------------------|-----------------------------------------|
| High invasive capacity | Panc10.05        | +                                       |
|                        | Panc01.28        | +                                       |
|                        | Panc2.8          | +                                       |
|                        | Panc2.03         | +                                       |
|                        | Panc4.03         | +                                       |
|                        | TS0129           | +                                       |
|                        | Panc2.13         | +                                       |
|                        | Panc2.43         | +                                       |
| Low invasive capacity  | Panc3.11         | -                                       |
|                        | Panc9.3.96       | -                                       |
|                        | Panc6.03         | +                                       |
|                        | Fibroblast Cells | -                                       |
